# Supplementary material for: Relaxing the assumption of constant transition rates in a multi-state model in hospital epidemiology
Source: PubMed Central journal article supplement (PMC7798316; doi:10.1186/s12874-020-01192-8), 2021-01-11
Supplement: 12874_2020_1192_MOESM2_ESM.pdf [file 12874_2020_1192_MOESM2_ESM.pdf]

## Additional File 2: Further Details of the Analysis Approaches

### Aalen-Johansen Estimator

The Aalen-Johansen estimator generalises the Kaplan-Meier estimator to Markov multistate processes. It was proposed by Aalen and Johansen [1] and has been discussed in detail by Andersen et al [2]. Following Allignol et al [3], let  $N_{ab}(t)$  be the number of direct transitions  $a \rightarrow b$  occurring up to time  $t$  and  $Y_a(t)$  be the number of individuals in state  $a$  at the time immediately before  $t$ , i.e. the number of individuals at risk of the transition  $a \rightarrow b$ . The matrix of cumulative transition hazards  $\mathbf{A}(t)$  can be estimated by the Nelson-Aalen estimator [2]:

$$\begin{aligned}\hat{A}_{ab}(t) &= \int_0^t \frac{dN_{ab}(u)}{Y_a(u)} du \quad a \neq b \\ \hat{A}_{aa}(t) &= - \sum_{b \neq a} \hat{A}_{ab}(t)\end{aligned}$$

The Aalen-Johansen estimator of the transition probabilities is then:

$$\hat{\mathbf{P}}(s, t) = \prod_{s < t_k \leq t} (\mathbf{I} + \Delta \hat{\mathbf{A}}(t_k))$$

Where  $\Delta \hat{A}_{ab}(t_k)$   $a \neq b$  is the number of observed direct  $a \rightarrow b$  transitions divided by the number of individuals in state  $a$  at the time immediately before  $t_k$ . The diagonal entries  $\Delta \hat{A}_{aa}(t_k)$  are such that the row equals 0.

The Aalen-Johansen estimator is a matrix of step-functions, changing only at the times when an event is observed. Expected length of stay can then be easily calculated as a summation of rectangles.

### Exponential Model

For transitions  $i = 1, \dots, 5$ , the transition rates  $h_i(t)$  for the exponential model are a non-negative constant  $\lambda_i \geq 0$ :

$$h_i(t) = \lambda_i$$

### Royston-Parmar Model (4 degrees of freedom)

Royston-Parmar models utilise restricted cubic splines to model the effect of time on the log cumulative hazard  $\ln\{H_i(t)\}$  scale. A Royston-Parmar model with  $K$  knots can be fitted by creating  $K - 1$  derived variables [4]. For models with  $K = 5$ , there will be 4 derived variables for each transition  $i$ :  $z_{ij}$ ,  $j = 1, \dots, 4$  and 5 knots for each transition  $i$ :  $k_{il}$ ,  $l = 1, \dots, 5$ . The equation for  $\ln\{H_i(t)\}$  and all necessary components are [4]:

$$\begin{aligned}\ln\{H_i(t)\} &= \gamma_{i0} + \gamma_{i1}z_{i1} + \gamma_{i2}z_{i2} + \gamma_{i3}z_{i3} + \gamma_{i4}z_{i4} \\ z_{i1} &= \ln(t) \\ z_{ij} &= (\ln(t) - k_{ij})_+^3 - \phi_{ij}(\ln(t) - k_{i1})_+^3 - (1 - \phi_{ij})(\ln(t) - k_{i5})_+^3 \quad j = 2, 3, 4 \\ \phi_{ij} &= (k_{i5} - k_{ij}) / (k_{i5} - k_{i1})\end{aligned}$$

Where  $\gamma_{ij}$  are the parameters to be estimated from the data. The internal knot locations  $k_{i2}$ ,  $k_{i3}$  and  $k_{i4}$  were chosen as the 25<sup>th</sup>, 50<sup>th</sup> and 75<sup>th</sup> centiles of the distribution of uncensored log event times for transition  $i$ , respectively [4].  $k_{i1}$  and  $k_{i5}$  are the boundary knots, located at the minimum and maximum of the uncensored log event times [4]. The model described here has 5 parameters: the 4 derived variables and the constant term. When fitting this model in

`Stata` using `merlin` or `stpm2`, the user would specify 4 degrees of freedom, as the intercept is included by default. For consistency with the programming, we have named this model “RP(4)” (Royston-Parmar with 4 degrees of freedom) in the main text.

The transition rates involve the derivative of the cubic spline functions. See Royston and Parmar [5] and Lambert and Royston [4] for more details on these models.

## AIC Model

The “AIC” model involved choosing the distribution with the lowest AIC for each transition. The candidate models were: exponential, Weibull, Gompertz, log-logistic, log-normal, generalised gamma and Royston-Parmar models with 2 to 5 degrees of freedom. The AIC results are given in the Results section under the subsection Transition Rates. The chosen distributions for each transition are repeated here:

1. **Transition 1:** Royston-Parmar model with 4 degrees of freedom.
2. **Transition 2:** Generalised gamma model.
3. **Transition 3:** Royston-Parmar model with 4 degrees of freedom.
4. **Transition 4:** Log-normal model.
5. **Transition 5:** Generalised gamma model.

Parametrisation of the generalised gamma and log-normal distribution are given below. The parameters to be estimated are specific to each transition  $i$ , but the subscript has been dropped for easier viewing.

### Generalised Gamma

The parametrisation follows the documentation in `Stata` for `streg` [6]. The transition rate is defined as  $h(t) = f(t)/S(t)$ , where the three parametrised gamma density and survivor functions are defined as:

$$f(t) = \begin{cases} \frac{\gamma^\gamma}{\sigma t \sqrt{\gamma} \Gamma(\gamma)} \exp(z\sqrt{\gamma} - u) & \kappa \neq 0 \\ \frac{1}{\sigma t \sqrt{2\pi}} \exp(-z^2/2) & \kappa = 0 \end{cases}$$

$$S(t) = \begin{cases} 1 - I(\gamma, u) & \kappa > 0 \\ 1 - \Phi(z) & \kappa = 0 \\ I(\gamma, u) & \kappa < 0 \end{cases}$$

Where  $\gamma = |\kappa|^{-2}$ ,  $z = \text{sign}(\kappa)\{\ln(t) - \mu\}/\sigma$ ,  $u = \gamma \exp(|\kappa|z)$ ,  $\Phi(\cdot)$  is the standard normal cumulative distribution function and  $I(a, x)$  is the incomplete gamma function. The parameter  $\mu$  and ancillary parameters  $\kappa$  and  $\sigma$  are to be estimated from the data. For more details see the help file for `streg` [6].

### Log-Normal

The parametrisation follows the documentation in **Stata** for **streg** [6] and also that of Royston [7]. The transition rates are defined as  $h(t) = f(t)/S(t)$ :

$$f(t) = \frac{1}{t\sigma\sqrt{2\pi}} \exp\left(-\frac{1}{2} \left[\frac{\ln(t) - \mu}{\sigma}\right]^2\right)$$
$$S(t) = 1 - \Phi\left(\frac{\ln(t) - \mu}{\sigma}\right)$$

Where  $\Phi(\cdot)$  is the standard normal cumulative distribution function.  $\mu$  is the location parameter and  $\sigma^2$  is the variance of random variable  $T$ . For more details see Royston [7] or the help file for **streg** [6].

## References

- [1] Aalen OO, Johansen S. An empirical transition matrix for non-homogeneous Markov chains based on censored observations. *Scand J Stat.* 1978;p. 141–150.
- [2] Andersen PK, Borgan O, Gill RD, Keiding N. *Statistical models based on counting processes.* New York: Springer-Verlag; 1993.
- [3] Allignol A, Schumacher M, Beyersmann J. Empirical transition matrix of multi-state models: The etm package. *J Stat Softw.* 2011;38(4):1–15.
- [4] Lambert PC, Royston P. Further development of flexible parametric models for survival analysis. *Stata J.* 2009;9(2):265–290.
- [5] Royston P, Parmar MK. Flexible parametric proportional-hazards and proportional-odds models for censored survival data, with application to prognostic modelling and estimation of treatment effects. *Stat Med.* 2002;21(15):2175–2197.
- [6] StataCorp. 2019. *Stata Statistical Software: Release 16.* College Station, TX: StataCorp LLC;.
- [7] Royston P. The lognormal distribution as a model for survival time in cancer, with an emphasis on prognostic factors. *Stat Neerl.* 2001;55(1):89–104.
