# Supplementary material for: Relaxing the assumption of constant transition rates in a multi-state model in hospital epidemiology
Source: PubMed Central journal article supplement (PMC7798316; doi:10.1186/s12874-020-01192-8), 2021-01-11
Supplement: 12874_2020_1192_MOESM3_ESM.pdf [file 12874_2020_1192_MOESM3_ESM.pdf]

### Additional File 3: Additional Figures

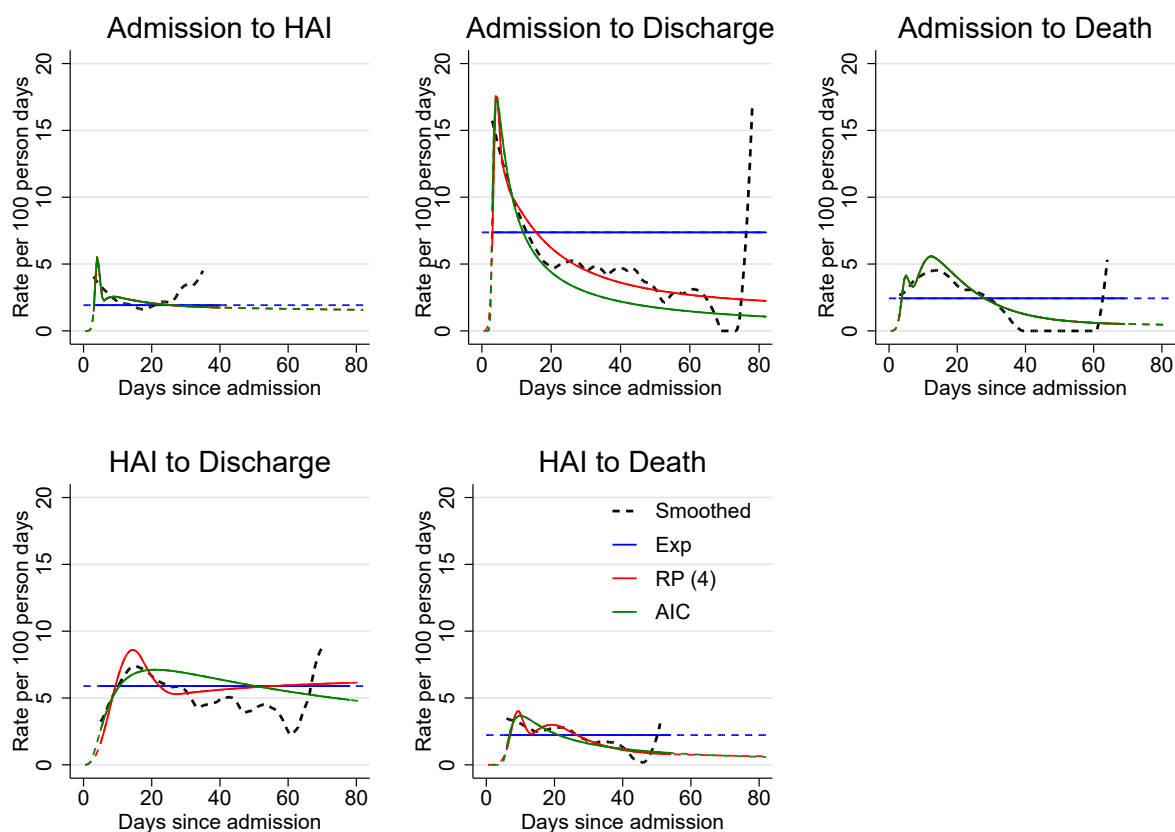

**Supplementary Figure 1:** Transition rates for the different approaches: Smoothed (dashed black), “Exp” (blue), “RP(4)” (red) and “AIC” (green). The Epanechnikov kernel was used for the smoothed non-parametric estimates. Estimates from the parametric approaches were defined from the time of the first event until the last event for each transition by a solid line and were extrapolated to cover the interval  $[0, 82]$  by a dashed line. The smoothed non-parametric estimates were truncated up to 8 days before the last event, as we did not believe the transition rates increased so drastically at the time of the last event

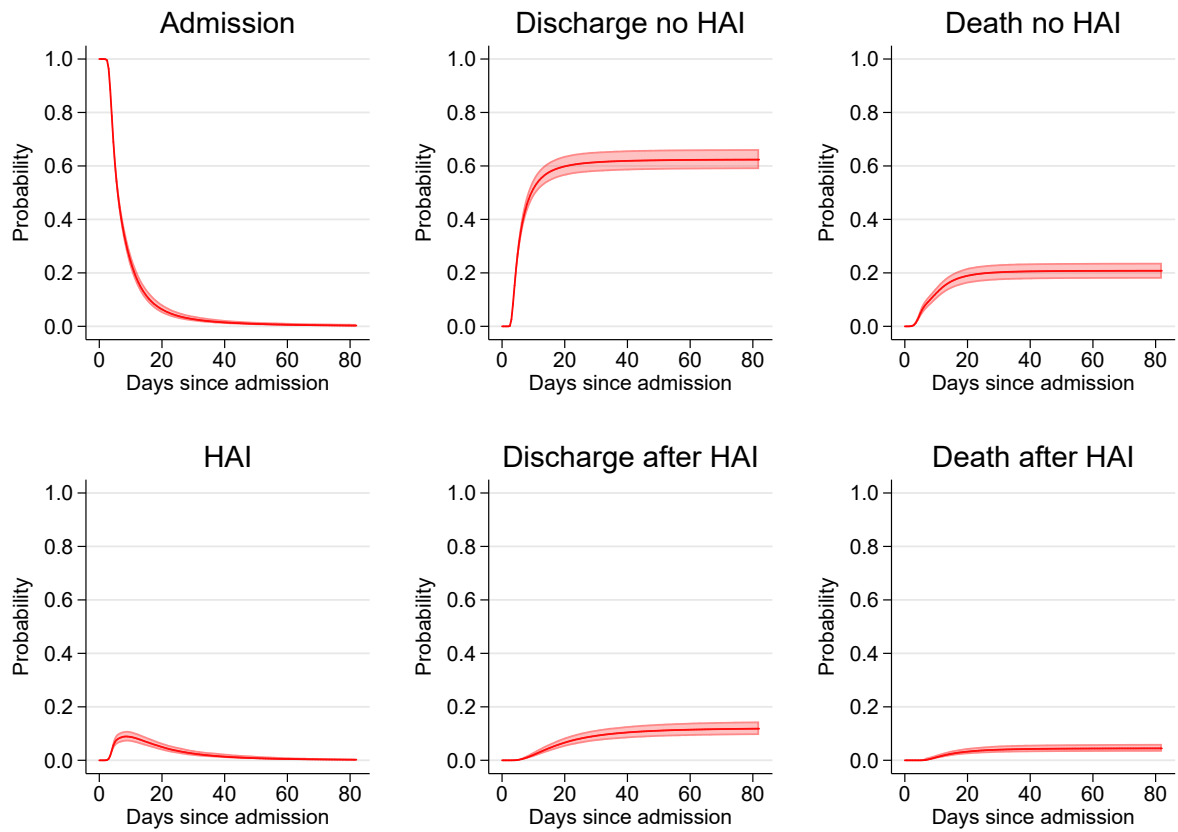

**Supplementary Figure 2:** Transition probabilities from state 1 at time 0 to each state for the “AIC” model (solid line) with 95% confidence intervals (shaded region)

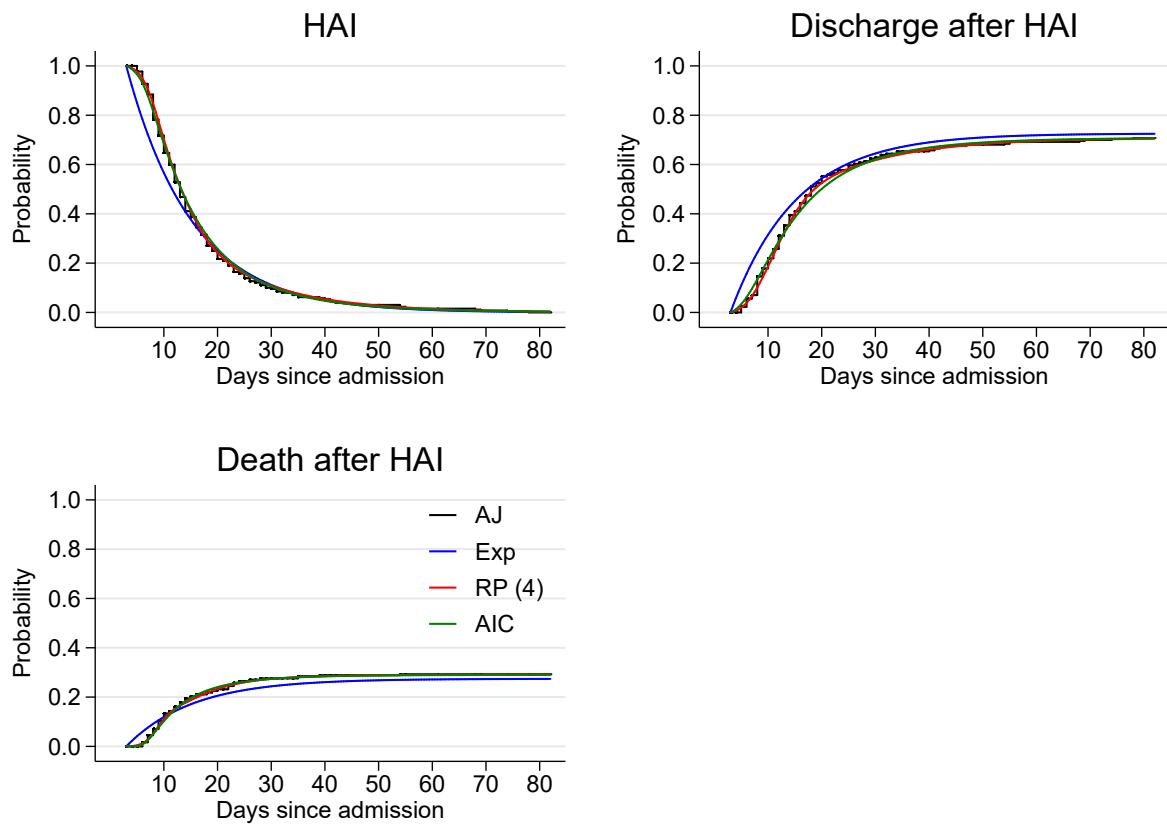

**Supplementary Figure 3:** Transition probabilities from state 2 at time 3 to the relevant states for the different approaches: “AJ” (black), “Exp” (blue), “RP(4)” (red) and “AIC” (green)

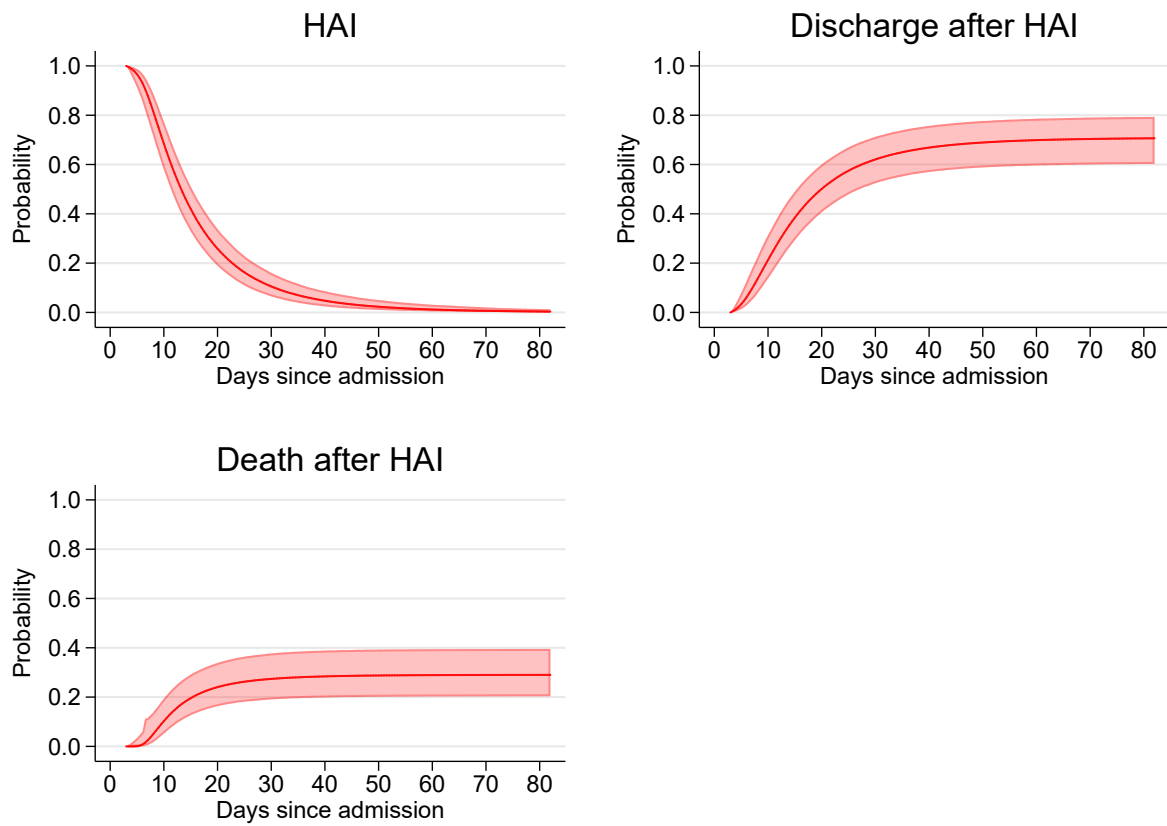

**Supplementary Figure 4:** Transition probabilities from state 2 at time 3 to the relevant states for the “AIC” model (solid line) with 95% confidence intervals (shaded region)

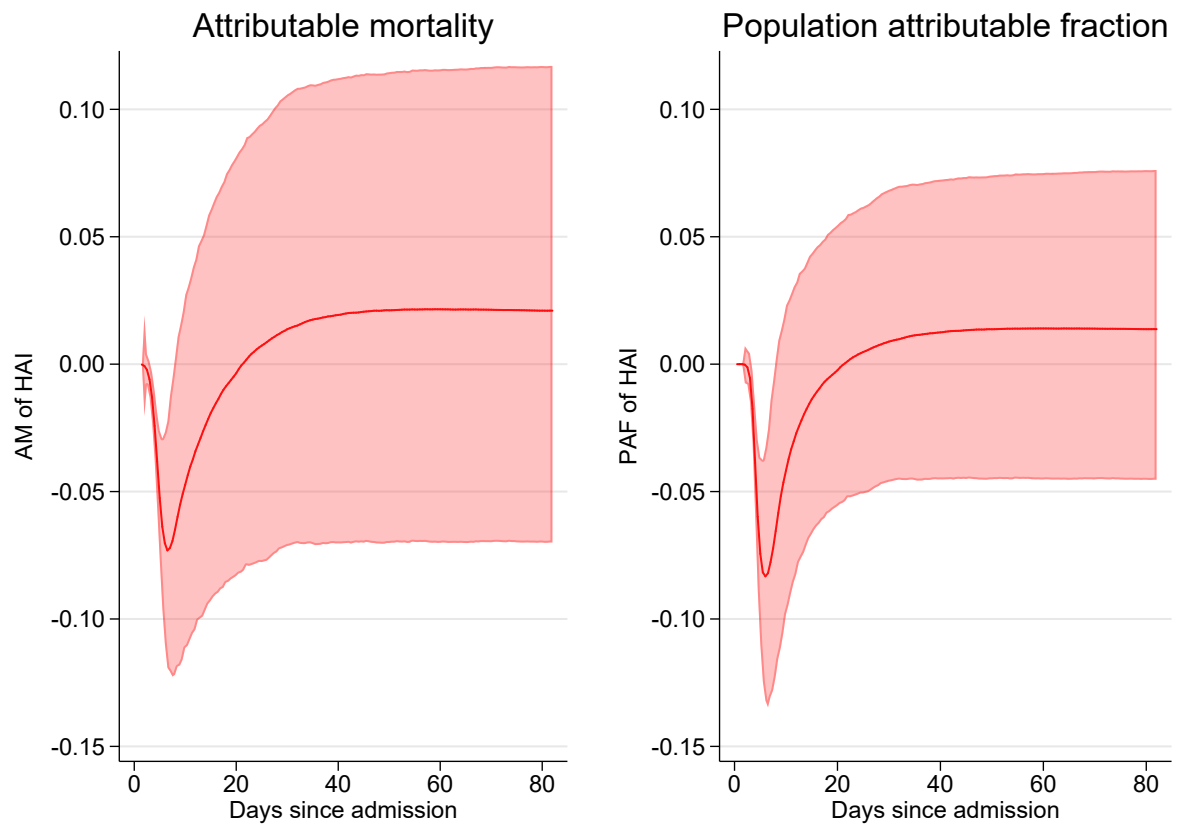

**Supplementary Figure 5:** Attributable mortality (AM) and population attributable fraction (PAF) of HAIs for the “AIC” model (solid line) with 95% confidence intervals (shaded region)

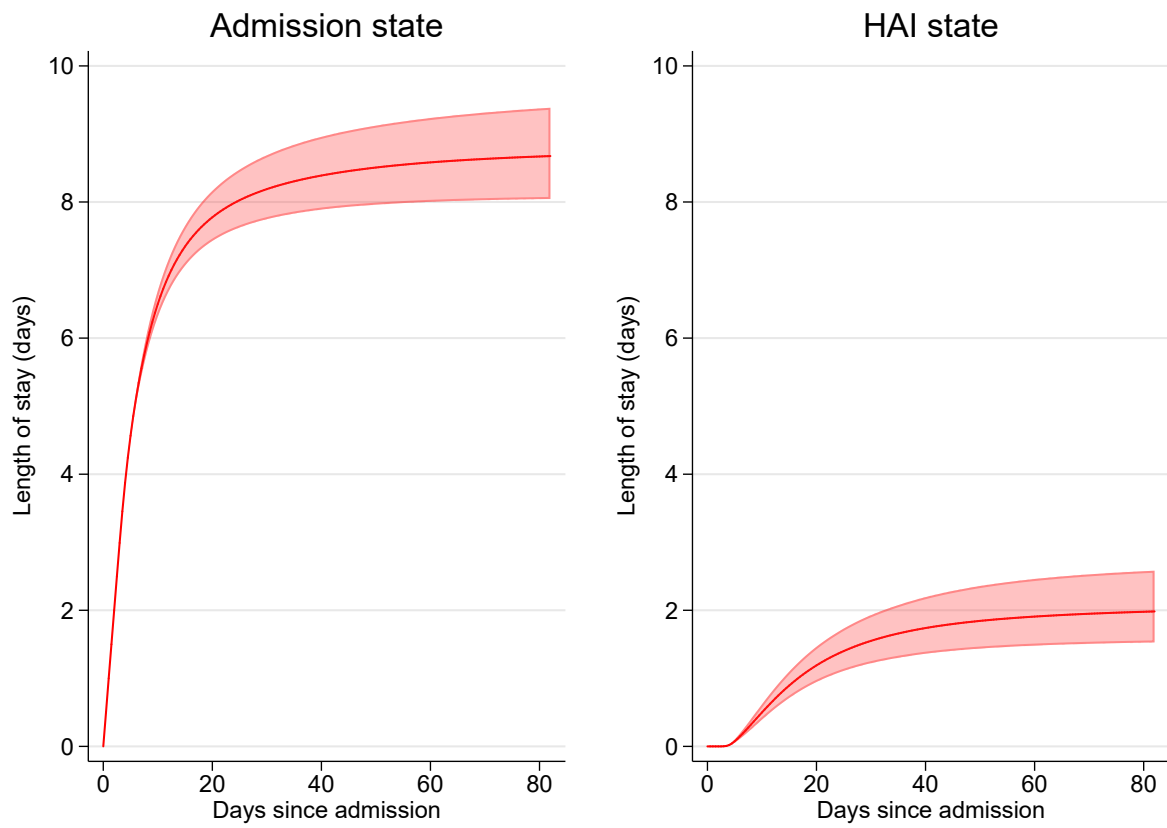

**Supplementary Figure 6:** Length of stay in hospital without (state 1, left panel) and with (state 2, right panel) a HAI starting from state 1 at time 0 for the “AIC” model (solid line) with 95% confidence intervals (shaded region)

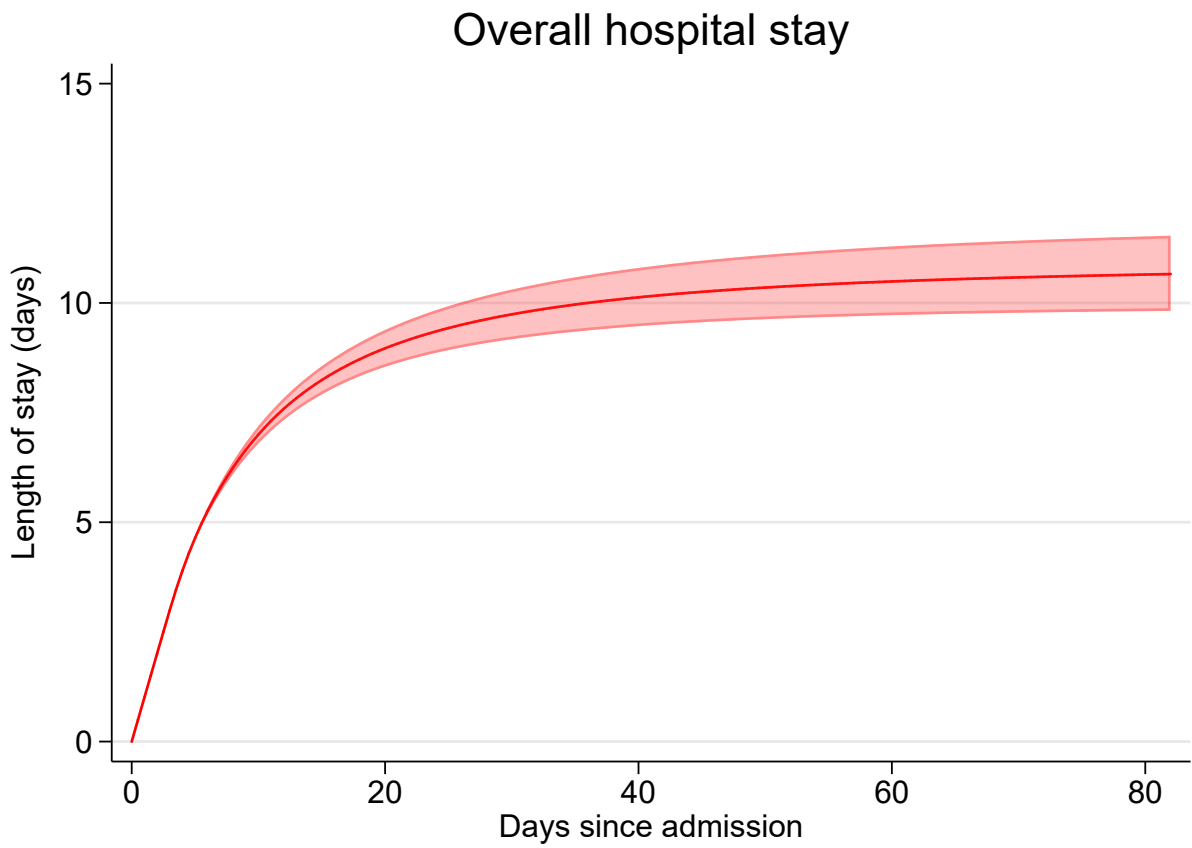

**Supplementary Figure 7:** Total length of stay in hospital from state 1 at time 0 for the “AIC” model (solid line) with 95% confidence intervals (shaded region)
